# Supplementary material for: Selection of reference genes for gene expression analysis in Liriodendron hybrids’ somatic embryogenesis and germinative tissues
Source: PubMed Central journal article supplement (PMC7925589; doi:10.1038/s41598-021-84518-w), 2021-03-02

# Selection of reference genes for gene expression analysis in *Liriodendron hybrids*' somatic embryogenesis and germinative tissues

Tingting Li<sup>1\*</sup>, Weigao Yuan<sup>1</sup>, Shuai Qiu<sup>2,3</sup>, Jisen Shi<sup>2</sup>

<sup>1</sup>Zhejiang Academy of Forestry, Zhejiang 310019, China

<sup>2</sup>Key Laboratory of Forest Genetics and Biotechnology, Ministry of Education of China, Co-Innovation Center for the Sustainable Forestry in Southern China, Nanjing Forestry University, Nanjing 210037, China

<sup>3</sup>Hangzhou Landscaping Incorporated, Hangzhou 310020, China

\*Corresponding author: Tingting Li: [tingtingli71@163.com](mailto:tingtingli71@163.com)

## Supplemental data 1. Agarose gel electrophoresis and melting curve of reference genes.

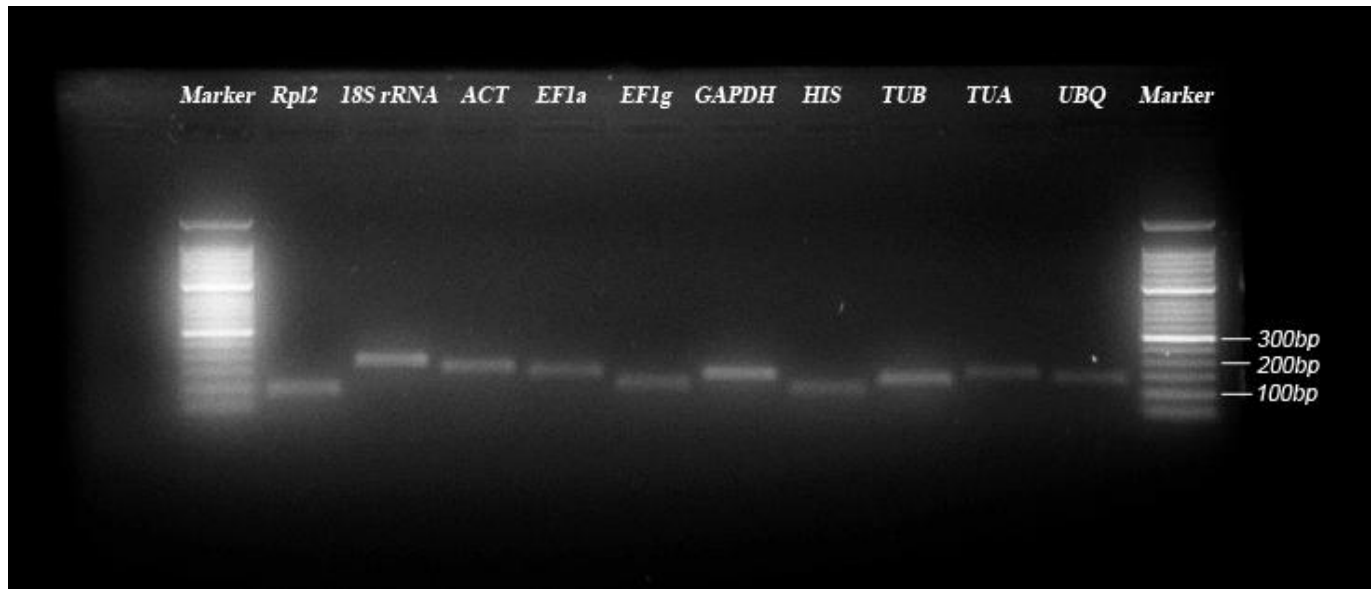

# Gradient dilute mixed samples

# Total development stages

Rpl2

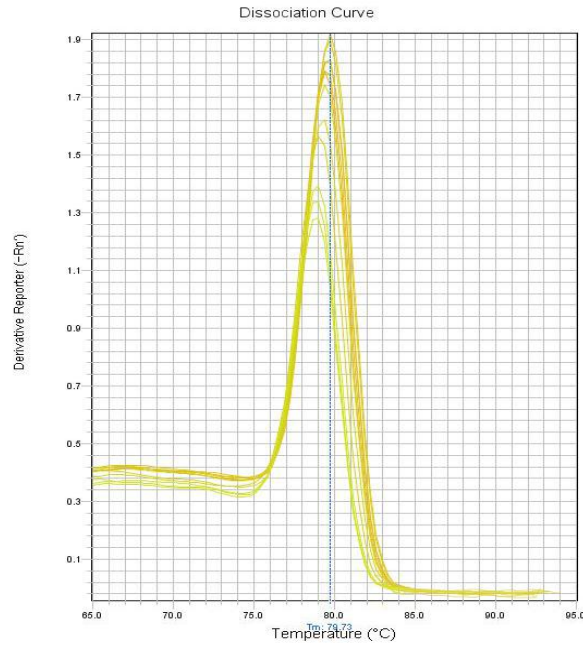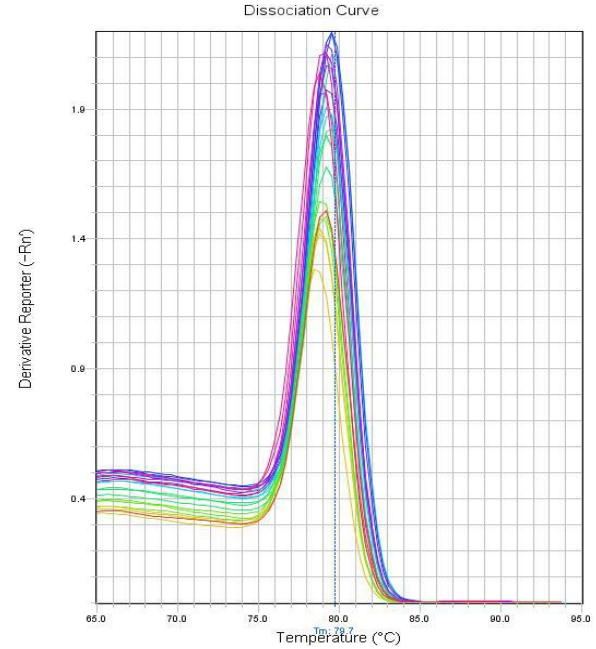

18S rRNA

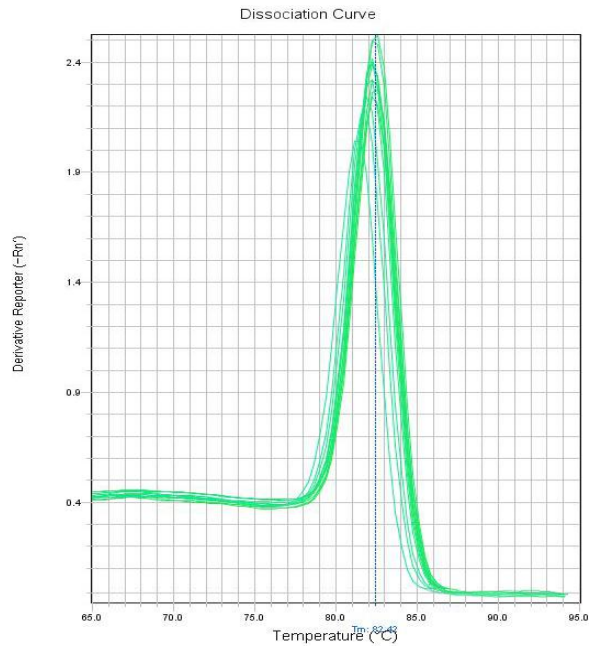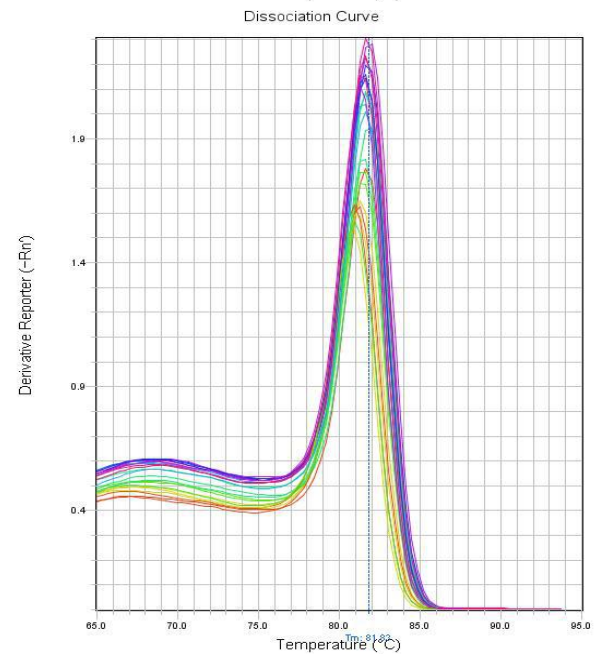

# Gradient dilute mixed samples

# Total development stages

ACT

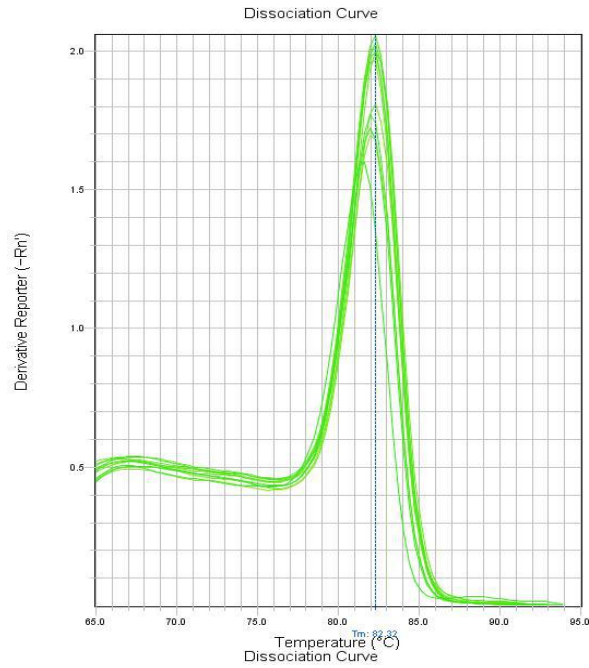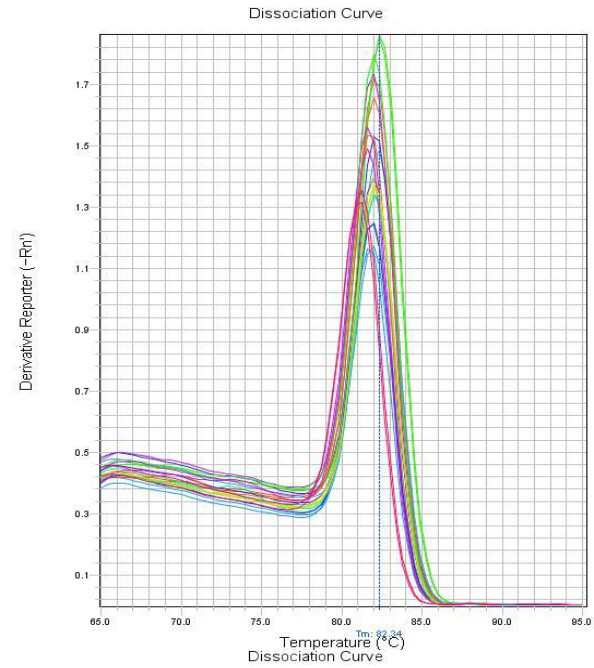

EF1a

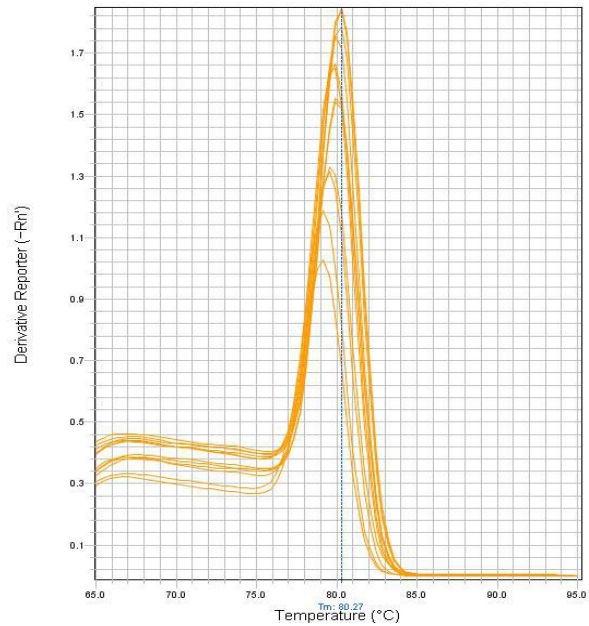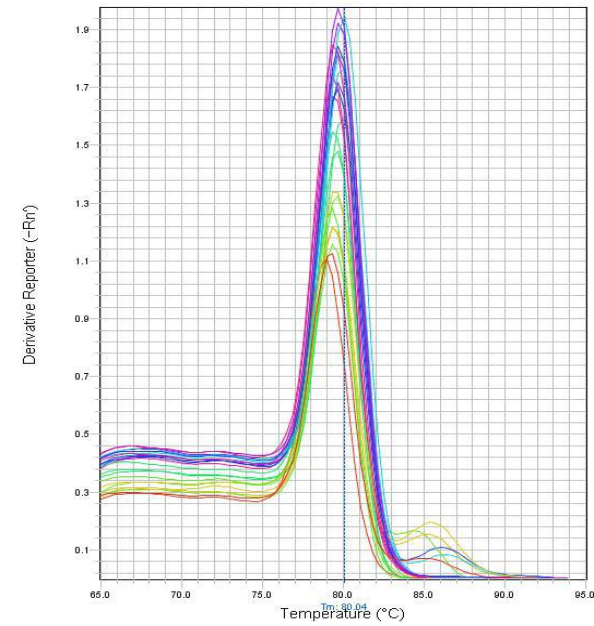

# Gradient dilute mixed samples

# Total development stages

EF1g

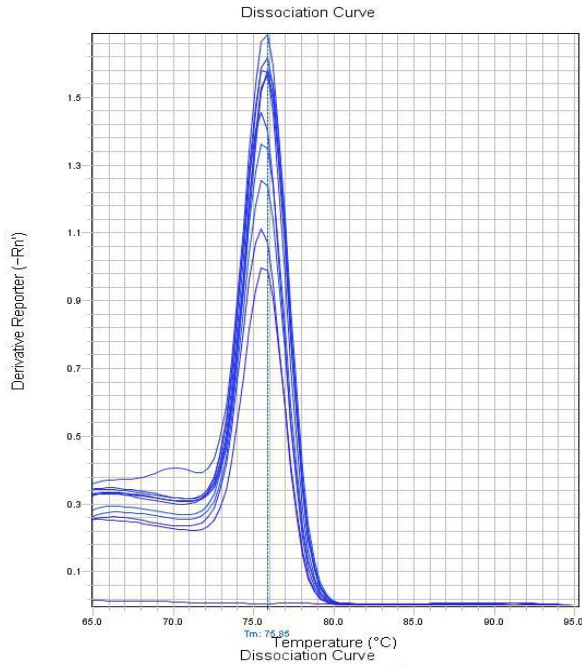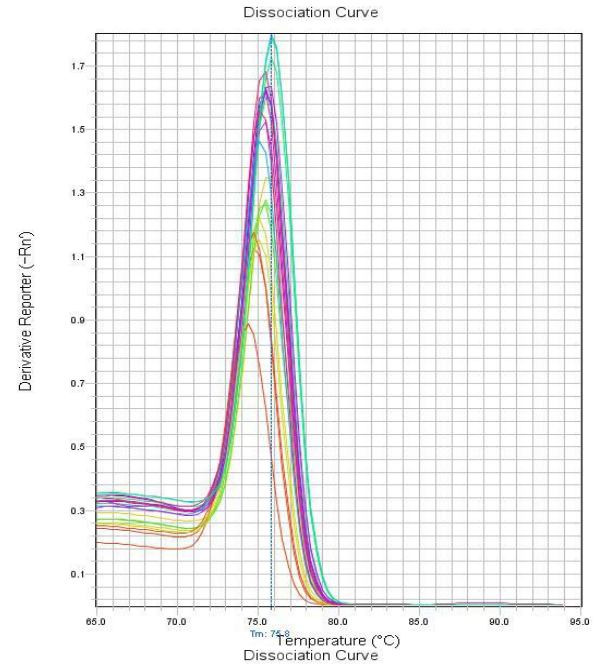

GAPDH

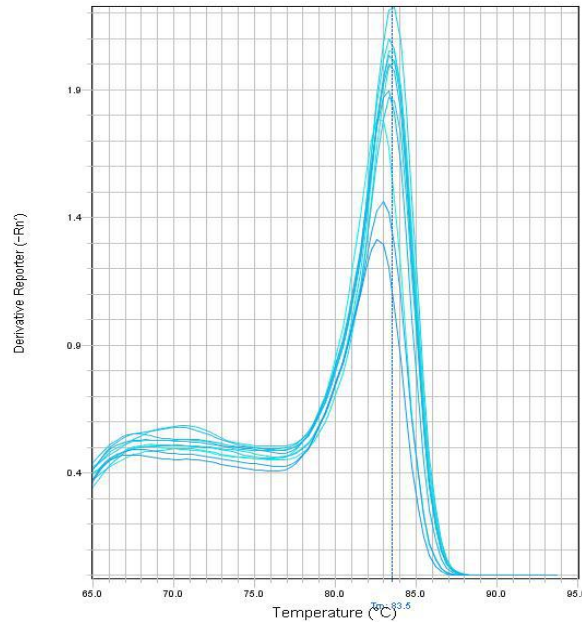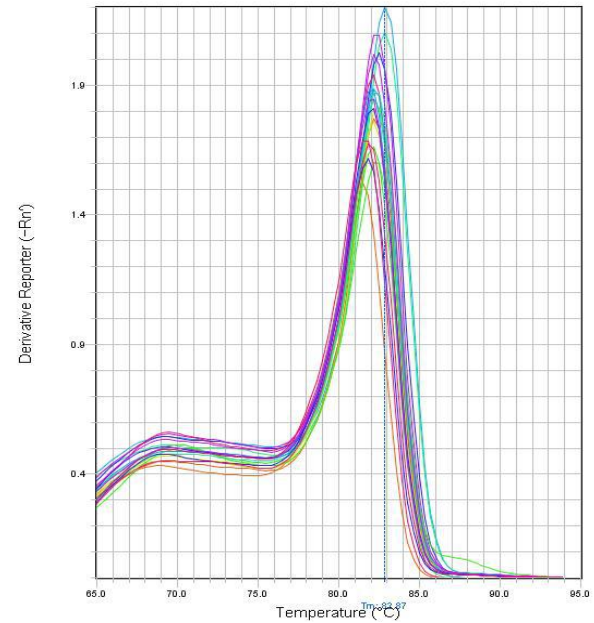

# Gradient dilute mixed samples

# Total development stages

HIS

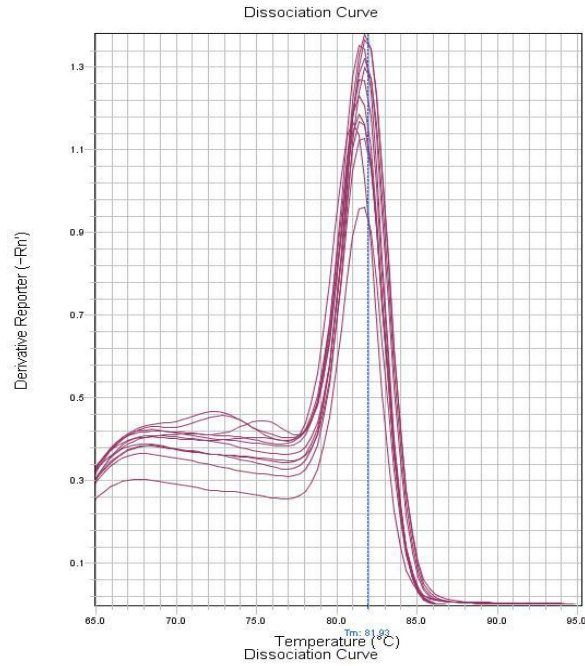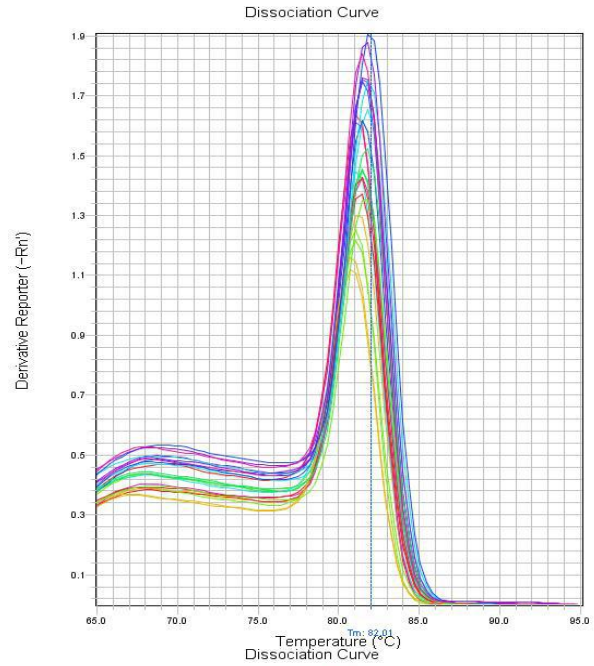

TUA

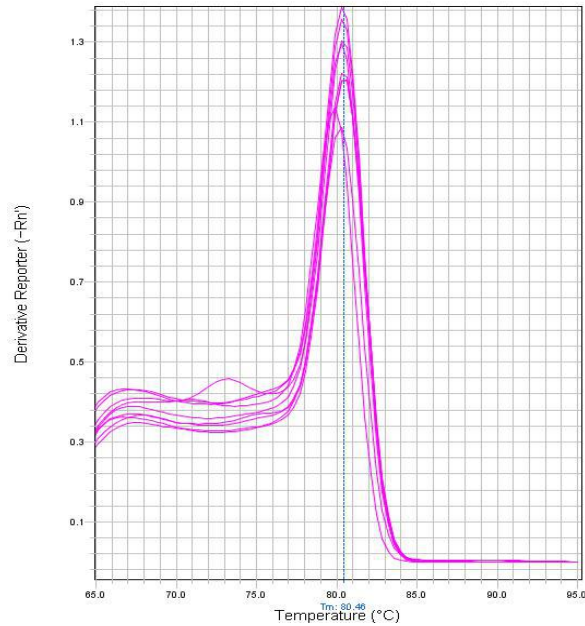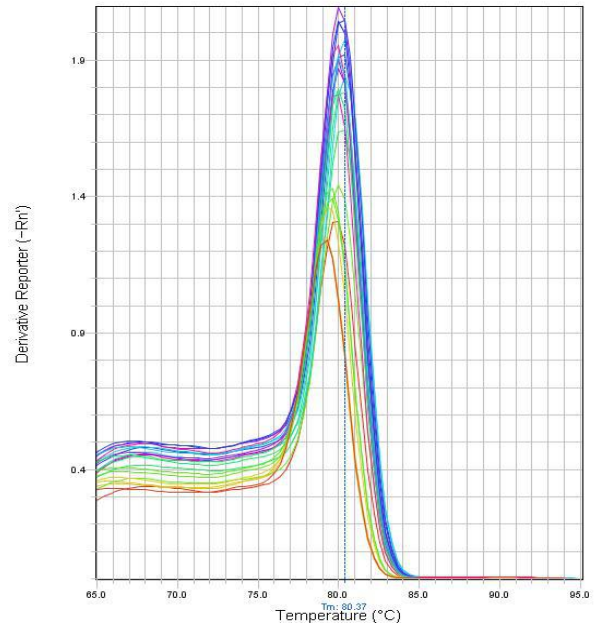

# Gradient dilute mixed samples

# Total development stages

TUB

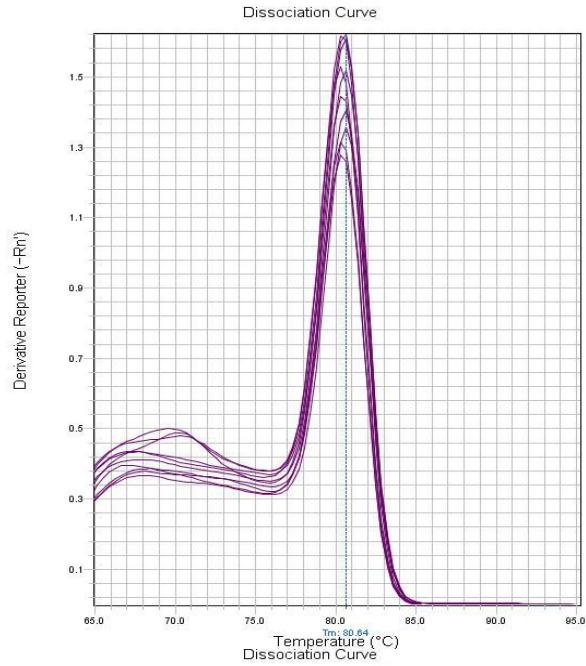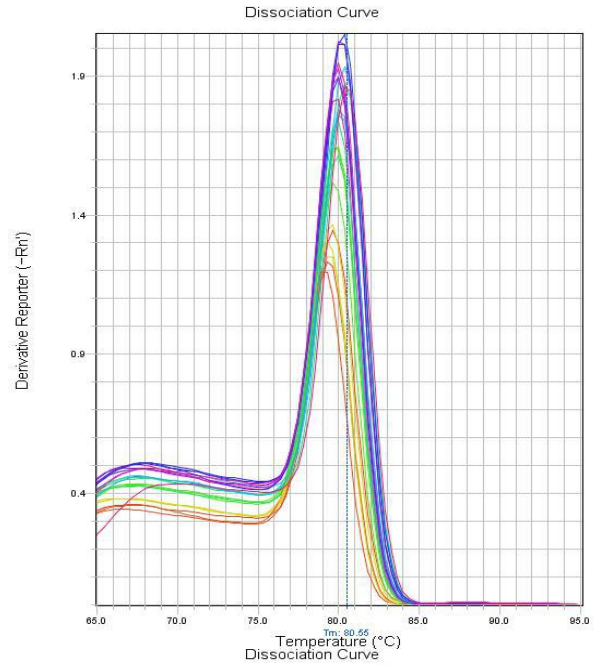

UBQ

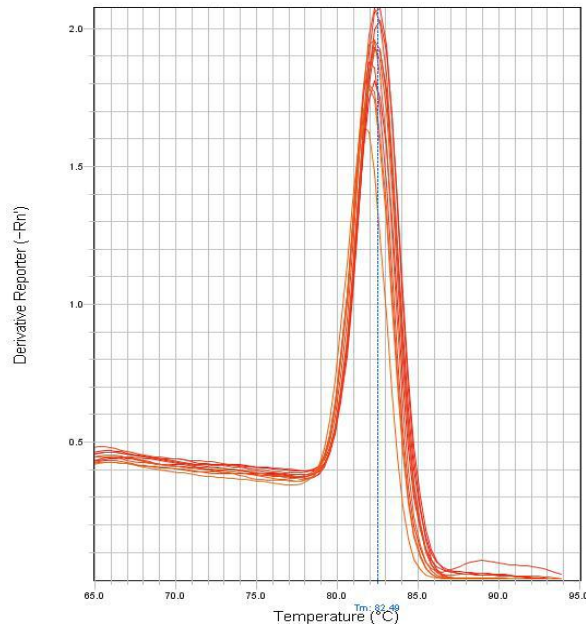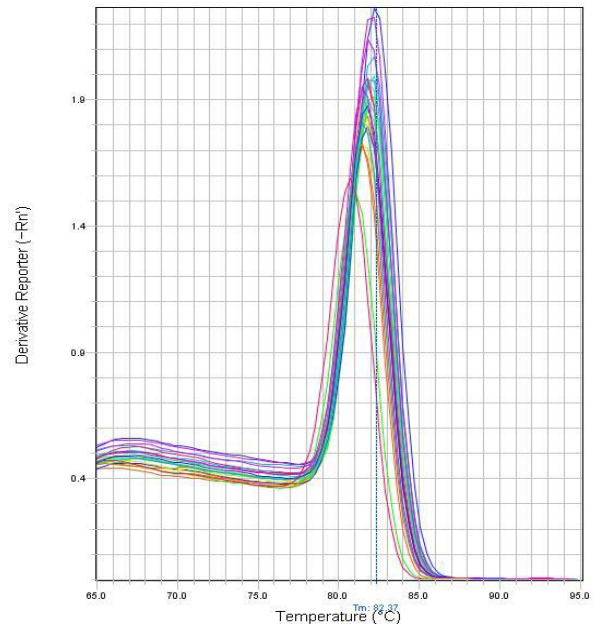

Supplement: 41598_2021_84518_MOESM1_ESM.pdf [file 41598_2021_84518_MOESM1_ESM.pdf]
